# Supplementary material for: CD13 is a critical regulator of cell–cell fusion in osteoclastogenesis
Source: PubMed Central journal article supplement (PMC8144195; doi:10.1038/s41598-021-90271-x), 2021-05-24
Supplement: 41598_2021_90271_MOESM1_ESM.pdf [file 41598_2021_90271_MOESM1_ESM.pdf]

## CD13 is a Critical Regulator of Cell-cell Fusion in Osteoclastogenesis

Mallika Ghosh<sup>1\*</sup>, Tomislav Kelava<sup>2</sup>, Ivana Vrhovac Madunic<sup>2</sup>, Ivo Kalajzic<sup>2</sup> and Linda H Shapiro,<sup>1</sup>

Centers for <sup>1</sup>Vascular Biology, <sup>2</sup>Regenerative Medicine and Skeletal Development  
University of Connecticut Medical School, Farmington, Connecticut 06032, USA

### **\*Corresponding authors:**

Linda H Shapiro, PhD  
Center for Vascular Biology  
University of Connecticut Medical School  
Farmington, CT 06030  
Email: [lshapiro@uchc.edu](mailto:lshapiro@uchc.edu)  
Telephone: 860-679-4373  
Fax: 860-679-1201

Mallika Ghosh, PhD  
Center for Vascular Biology  
University of Connecticut Medical School  
Farmington, CT 06030  
Email: [mghosh@uchc.edu](mailto:mghosh@uchc.edu)  
Telephone: 860-679-1189  
Fax: 860-679-1201

Conflict of interest: The authors have declared that no conflict of interest exists.

a

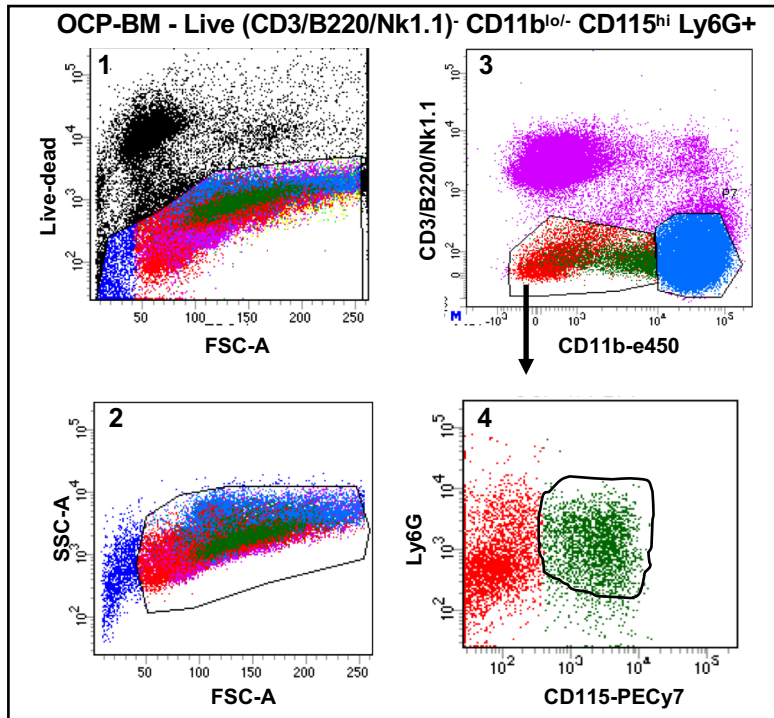

b

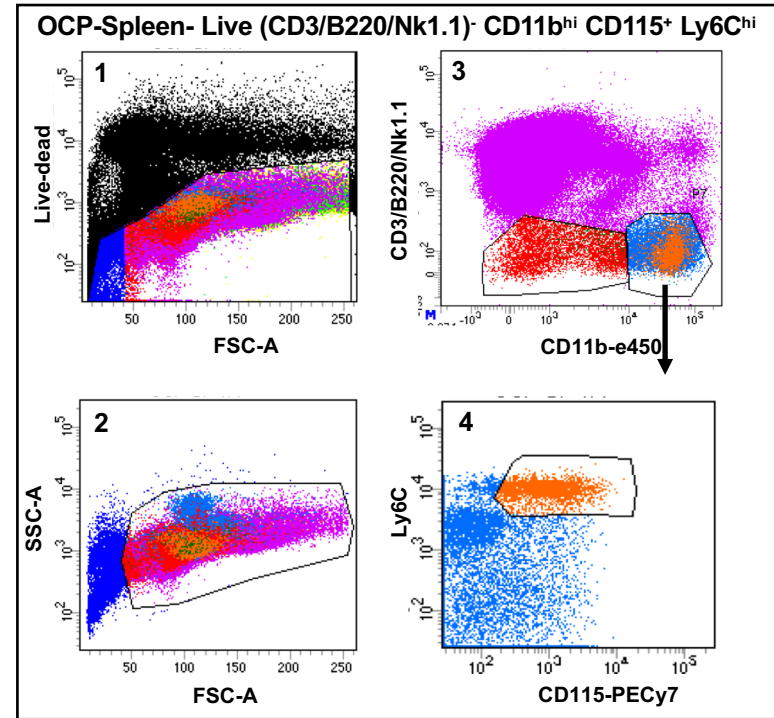

**FIG S1. Representative image of flow sorting strategy of isolation of osteoclast progenitors from primary murine bone marrow or spleen from WT and CD13<sup>KO</sup> mice.** Live (CD3/B220/Nk1.1)<sup>-</sup> CD11b<sup>lo/-</sup> CD115<sup>hi</sup> Ly6G<sup>+</sup> OCP cells were sorted from BM (a) or Live (CD3/B220/Nk1.1)<sup>-</sup> CD11b<sup>hi</sup> CD115<sup>+</sup> Ly6C<sup>hi</sup> OCP cells were sorted from spleen (b) to homogeneity using BD FACS ARIA and analyzed by FACS Diva version 9 (<https://www.bdbiosciences.com/en-us/instruments/research-instruments/research-software/flow-cytometry-acquisition/facsdiva-software>) and FlowJo (<https://www.flowjo.com/>) version 9.9.

FIG. S1

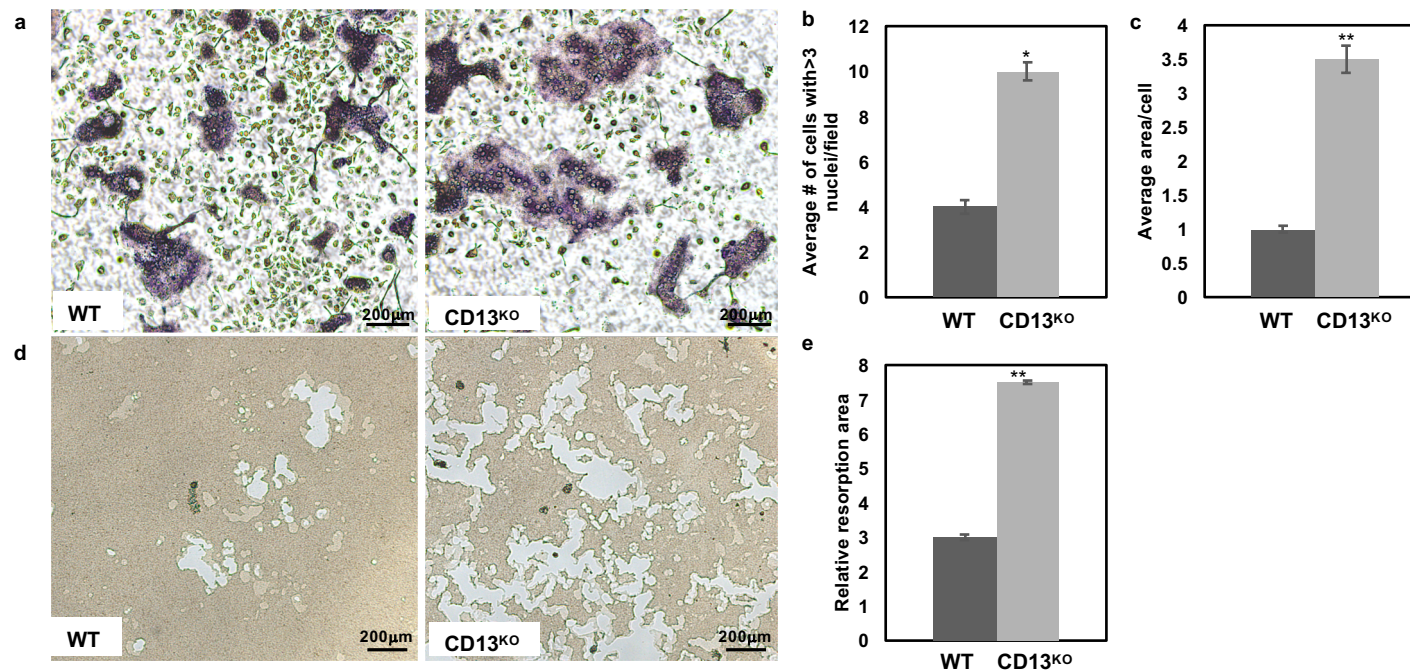

**FIG S2. Formation of TRAP+ multinucleated BM-derived OCs isolated from aged mice are markedly enhanced in the absence of CD13.**  
**a).** Primary murine BM derived OCs number and size /OC grown on tissue culture dish isolated from CD13<sup>KO</sup> and WT at d5. **b).** Average # of cells with >3 nuclei/field and **c).** Average cell area per OCs in CD13<sup>KO</sup> are significantly larger than the WT OCs analyzed by and analyzed by using Zeiss Zen 2.0 Pro blue edition software ([https://www.zeiss.com/content/dam/Microscopy/Downloads/Pdf/FAQs/zen2-blue-edition\\_installation-guide.pdf](https://www.zeiss.com/content/dam/Microscopy/Downloads/Pdf/FAQs/zen2-blue-edition_installation-guide.pdf)) .  
**d).** Area of resorption in CD13<sup>KO</sup> and WT OCs grown on osteoplates for d10 by phase contrast imaging using Olympus cellSens Dimension V0118 software (Olympus Scientific) (<https://www.olympus-lifescience.com/en/software/cellsens/>) & quantified by Image J (<https://imagej.nih.gov/ij/>) (**e**) are shown. Scale bar; 200 $\mu$ m. Data represents +/- SEM of three independent experiments. N=6/genotype, \*\*;p<0.01, \*;p<0.05.

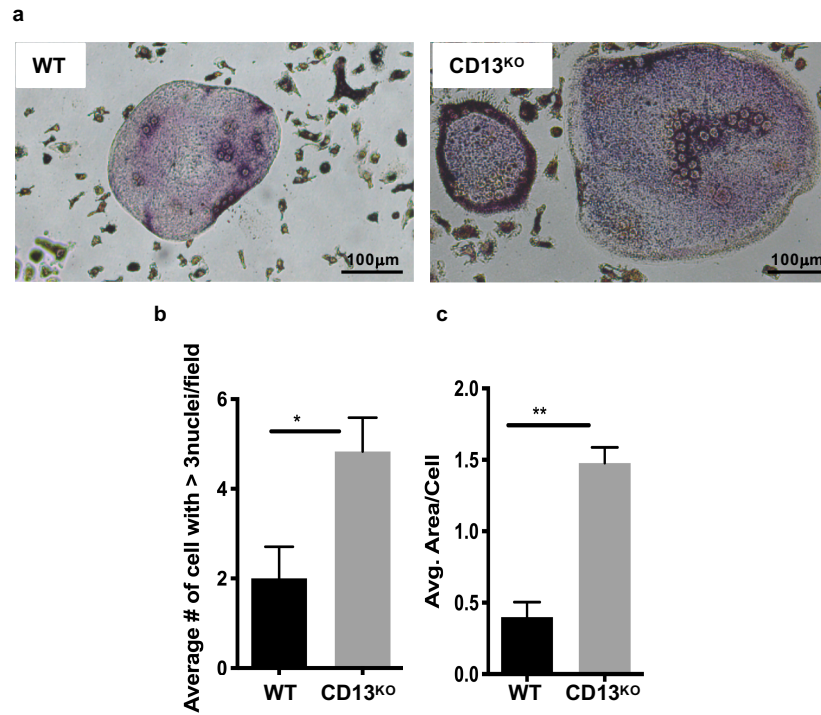

**FIG S3. Increased TRAP<sup>+</sup> splenic multinucleated OCs in the absence of CD13 in vitro.** **a).** Flow-sorted primary murine spleen-derived OCP grown on plastic in the presence of M-CSF and RANKL led to enhanced OCs size and number of nuclei/OC in CD13<sup>KO</sup> cells compared to WT at d7. **b).** Average # of cells with >3 nuclei/field and **c).** Average cell area per OC in CD13<sup>KO</sup> are significantly larger than the WT cells analyzed by using Zeiss Zen 2.0 Pro blue edition software ([https://www.zeiss.com/content/dam/Microscopy/Downloads/Pdf/FAQs/zen2-blue-edition\\_installation-guide.pdf](https://www.zeiss.com/content/dam/Microscopy/Downloads/Pdf/FAQs/zen2-blue-edition_installation-guide.pdf)). Scale bar; 100µm. Data represents +/- SEM of three independent experiments. N=6/genotype, \*\*,p<0.01.

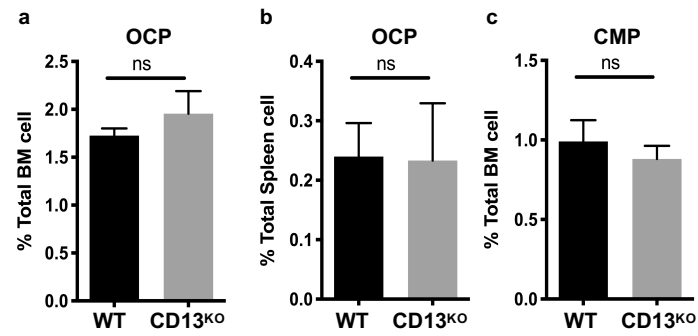

**FIG S4. Osteoclast progenitors with osteoclastogenic potential are similar in WT and CD13<sup>KO</sup> BM and periphery.** Flow cytometric analysis of OCP profile of WT and CD13<sup>KO</sup> mice indicated by CD3<sup>+</sup>, B220<sup>-</sup>, NK1.1<sup>-</sup>, CD11b<sup>-/lo</sup>, CD115<sup>+</sup>, CD117<sup>+</sup> in the BM (a), and CD3<sup>+</sup>, B220<sup>-</sup>, NK1.1<sup>-</sup>, CD11b<sup>+</sup>, Ly6G<sup>-</sup>, Ly6C<sup>+</sup>, CD115<sup>+</sup> in spleen (b), and common myeloid progenitor population indicated by lin<sup>-</sup> c-kit<sup>+</sup> Sca-1<sup>+</sup> CD34<sup>+</sup> in the BM analyzed by FlowJo software version 9.9 (<https://www.flowjo.com/>) (c). Data represents +/- SEM of three independent experiments. N=6/genotype.

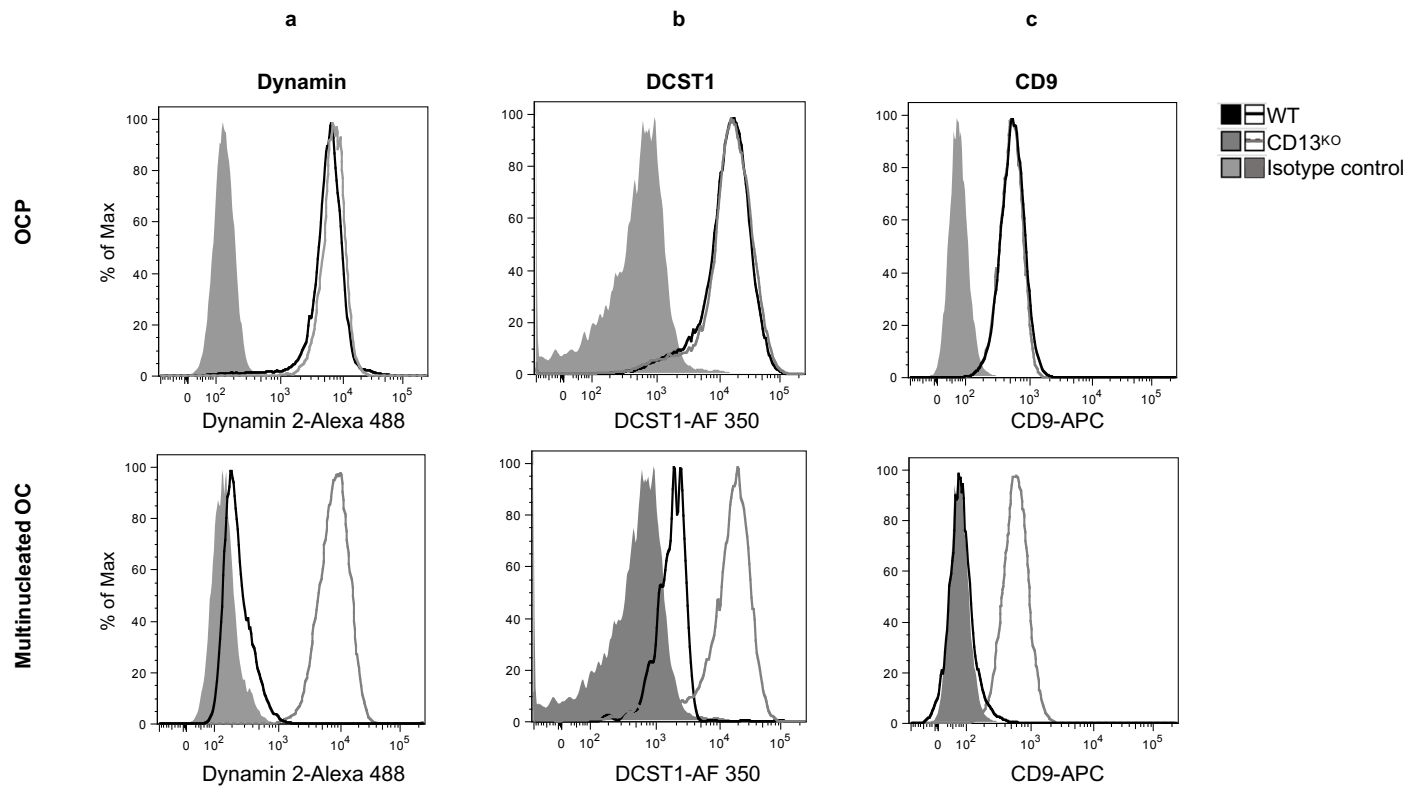

**FIG S5. Representative histogram of dynamin, DCST1 and CD9 surface expression in osteoclast progenitors (OCP) and multinucleated OC isolated from WT and CD13<sup>KO</sup> mice.** Abundance at the surface was analyzed by staining with goat anti-rabbit dynamin2-Alexa 488 (a), rabbit anti-mouse DCST1-Alexa fluor 350 (b) and rat anti-mouse CD9-APC (c) followed by flow cytometry and analyzed by FlowJo software version 9.9 (<https://www.flowjo.com/>). Goat IgG-Alexa 488 (a) or rabbit IgG-AF350 (b) or rat IgG APC (c) was used as isotype control. N=3/genotype.

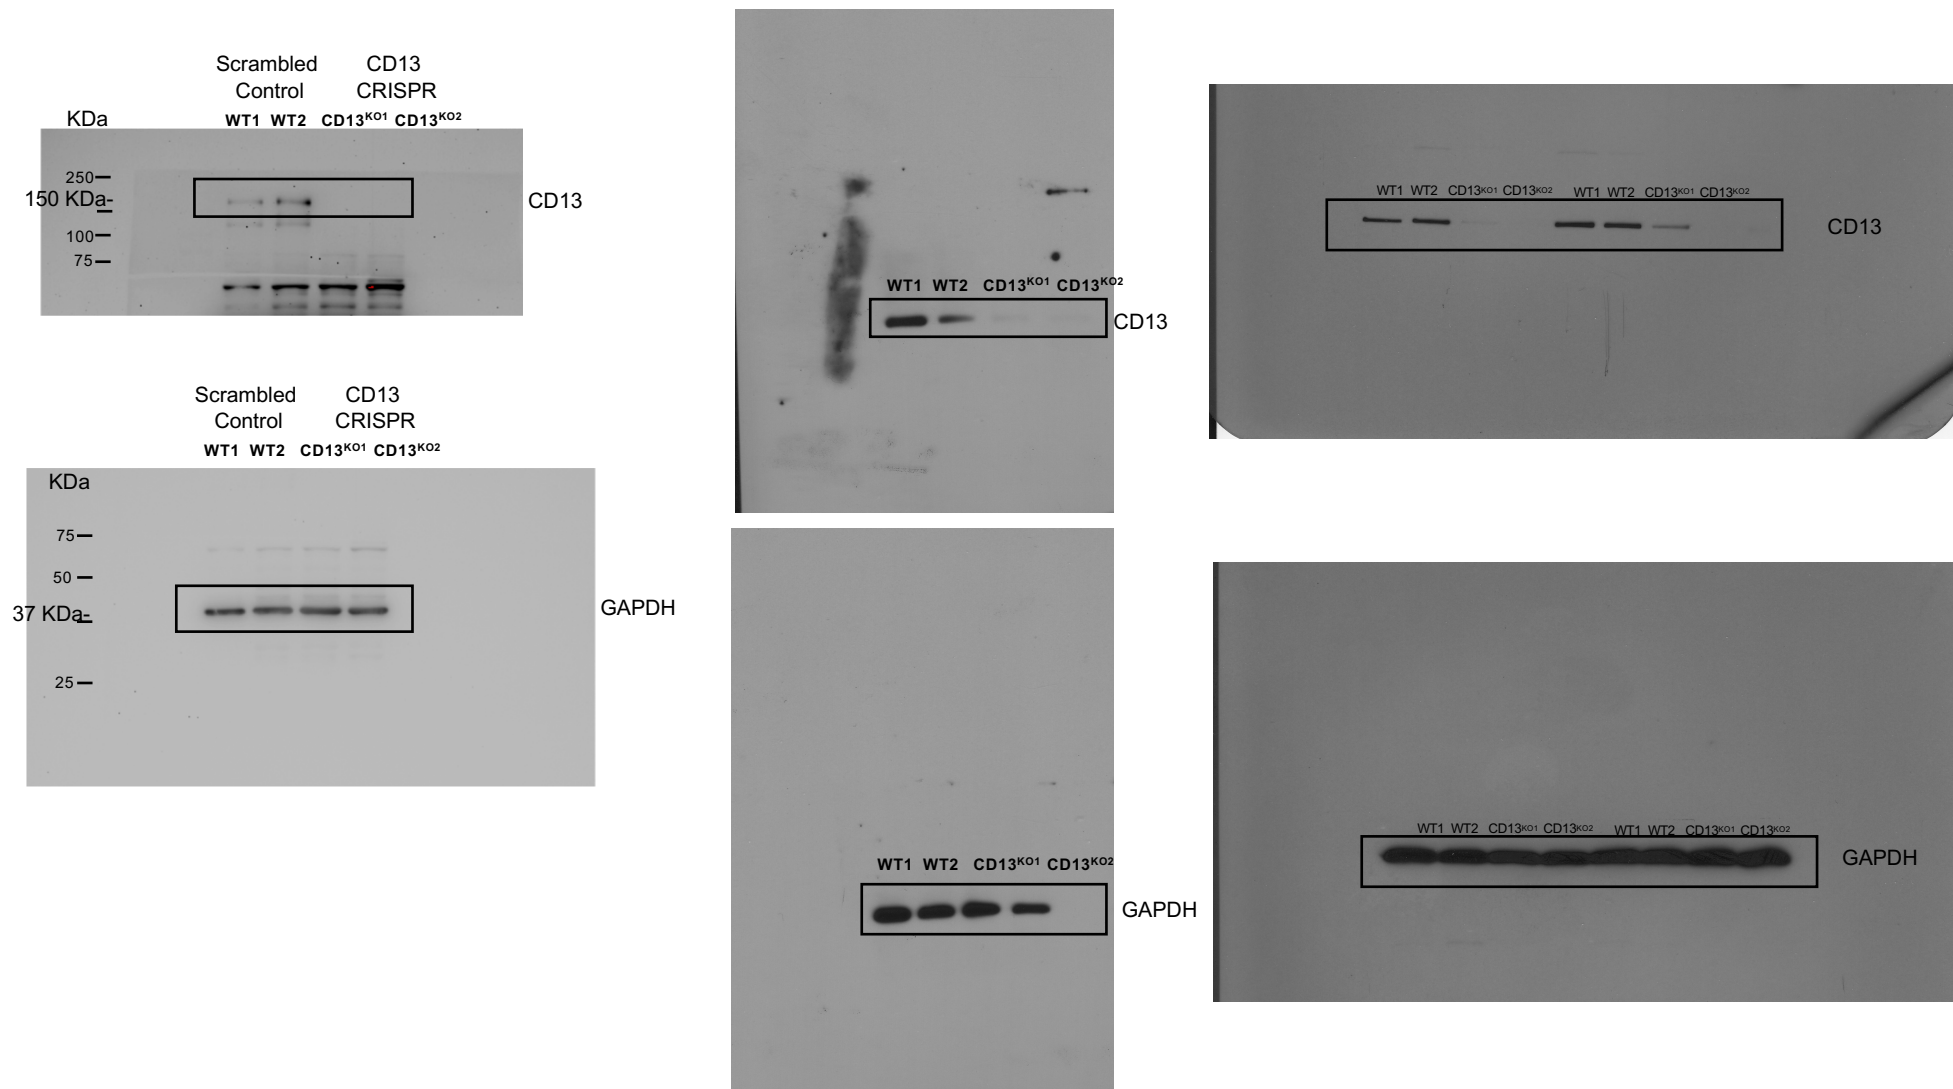

FIG S6. Full-length individual blots and cropped replicates of Fig. 5f.

FIG. S6

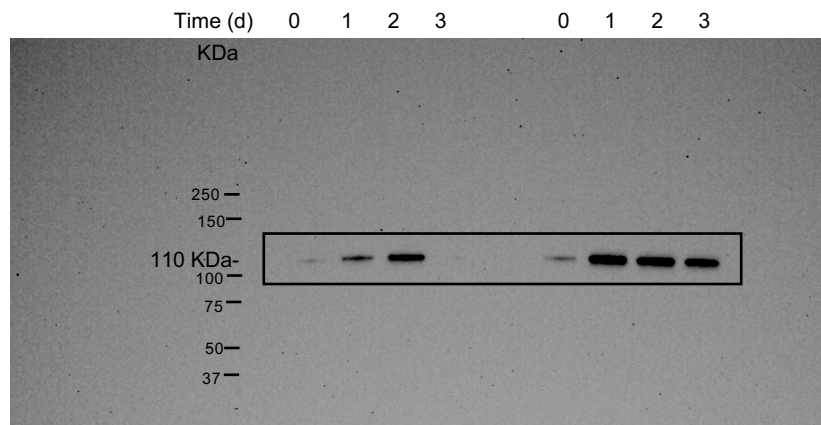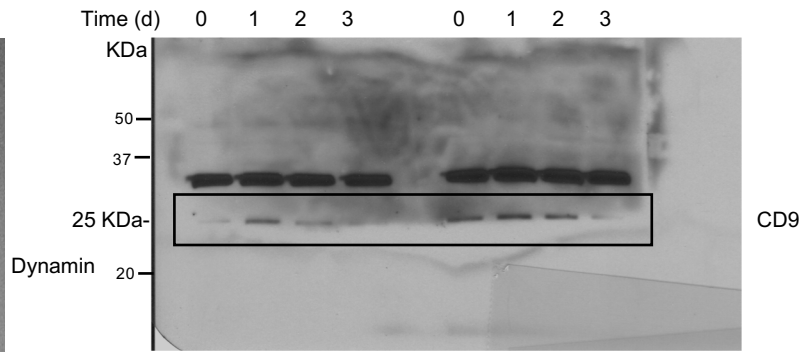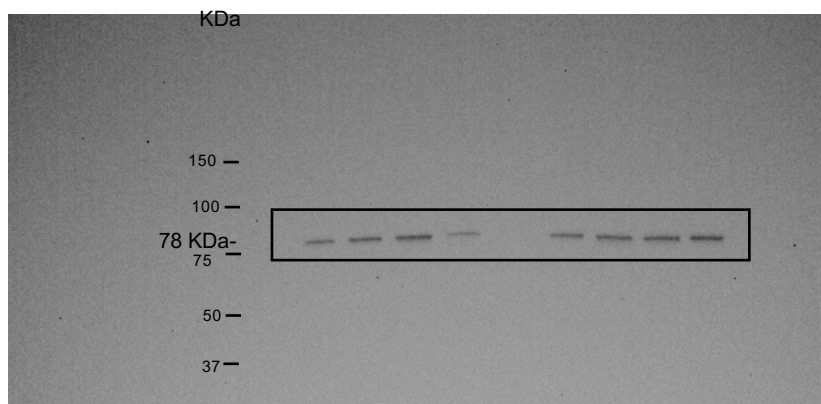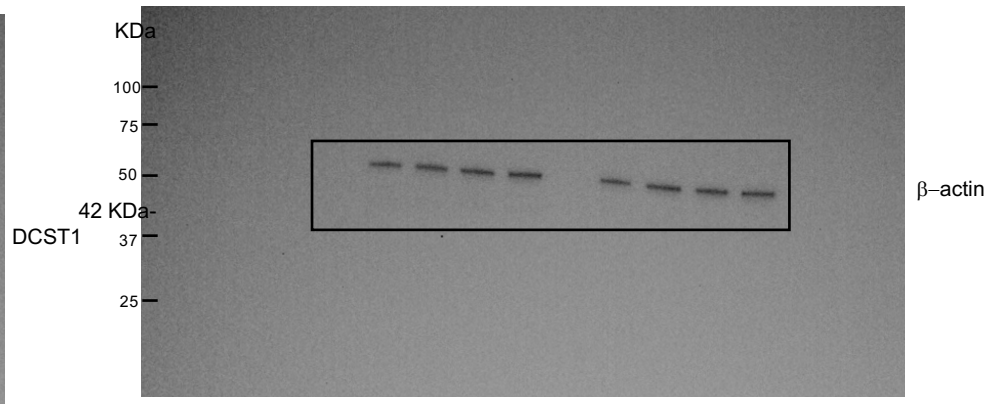

WT

CD13<sup>ko</sup>

WT

CD13<sup>ko</sup>

FIG S7. Full-length individual blots of Fig. 7a.

FIG. S7



a

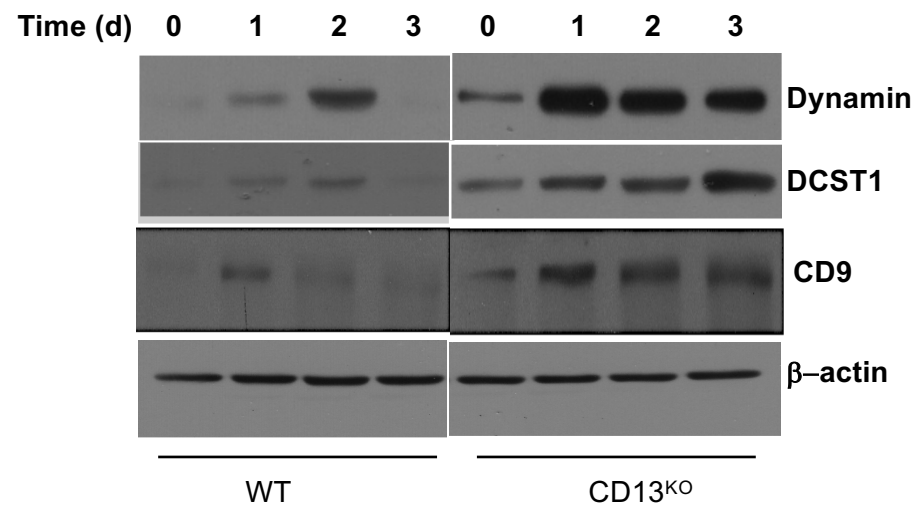

FIG S8. Cropped replicates of Fig. 7a.

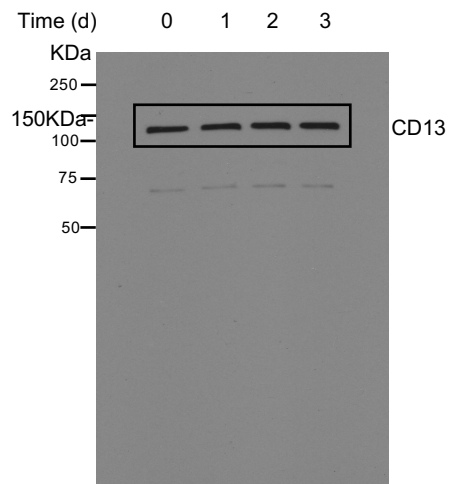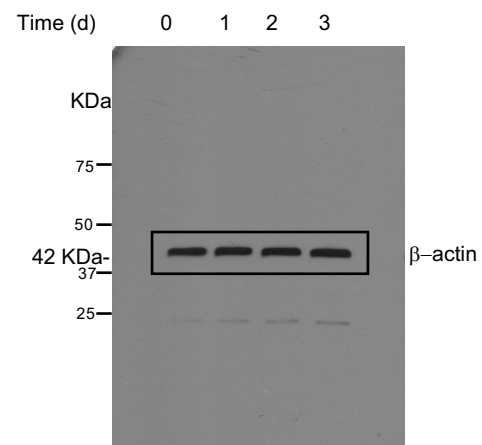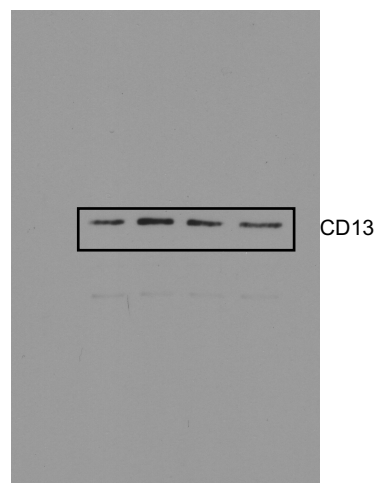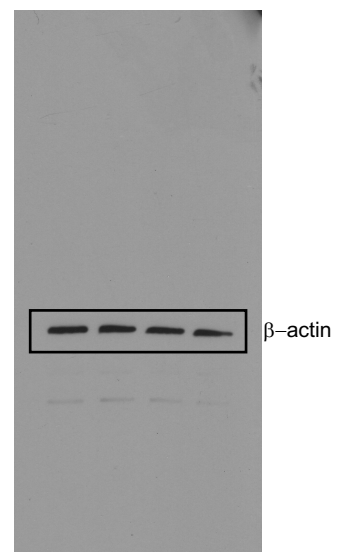

FIG S9. Full-length individual blots of Fig. 7c.

FIG. S9

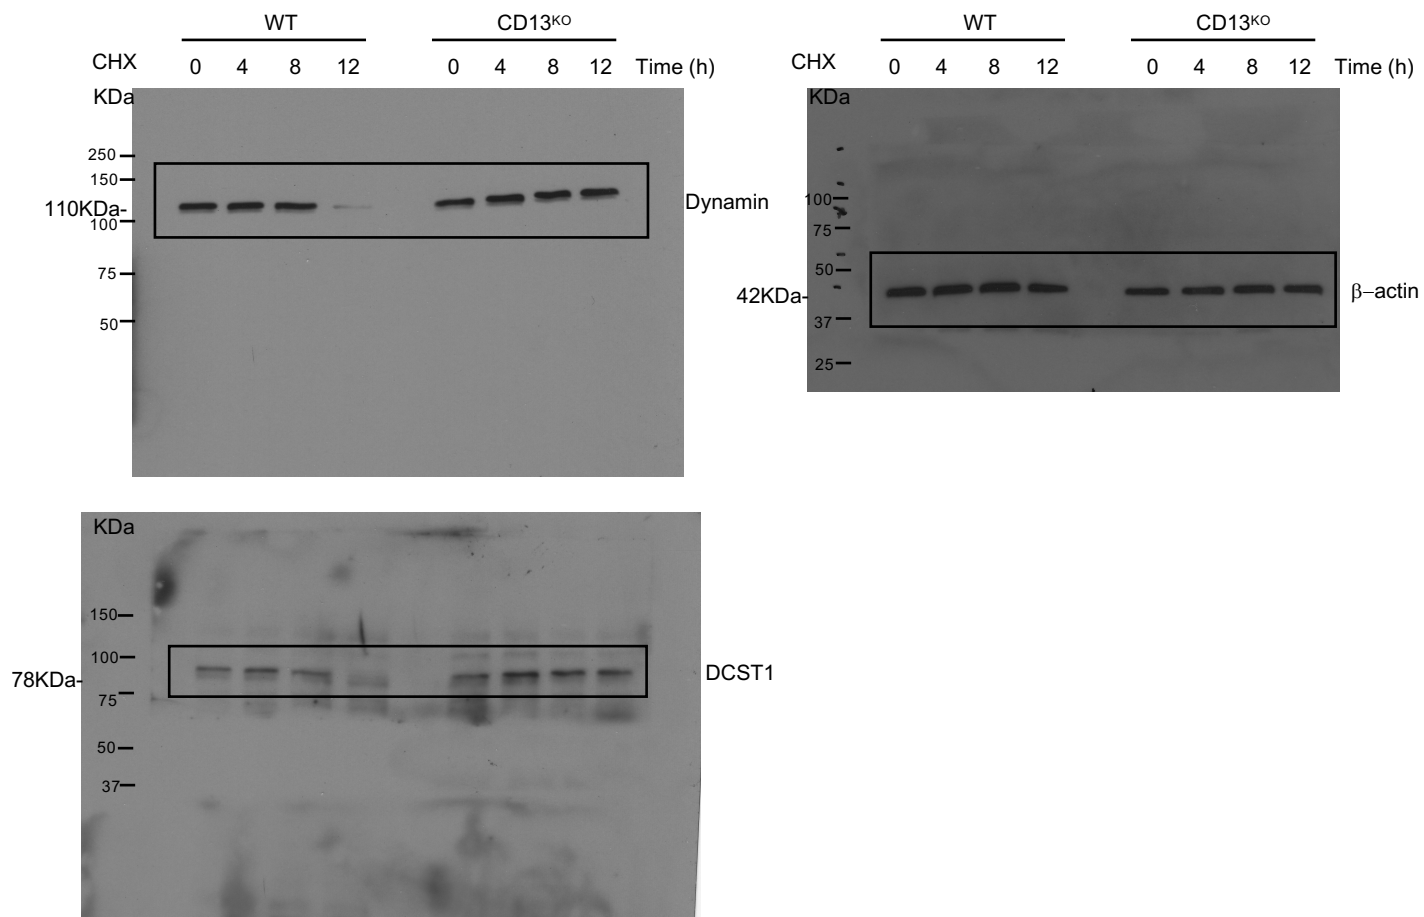

FIG S10. Full-length individual blots of Fig. 8b.

FIG. S10

**b**

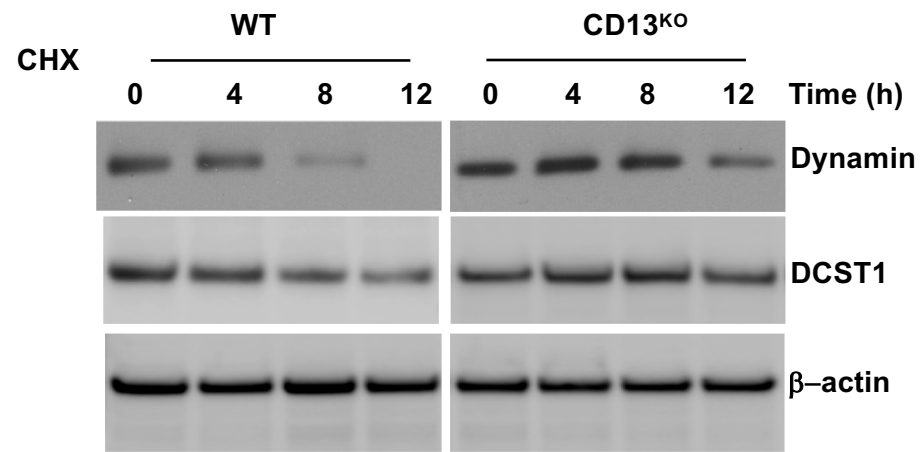

FIG S11. Cropped replicates of Fig. 8b.
